1 **Title:** Stress response of *Chironomus riparius* to changes in water temperature and oxygen  
2 concentration in a lowland stream

3  
4 **Short title:** *Chironomus riparius* stress response

5  
6 **Authors:** Alessandro Manfrin<sup>a,b,c,d</sup>, Stefano Larsen<sup>e,f</sup>, Massimiliano Scalici<sup>g</sup>, Sven Wuertz<sup>a</sup>, Michael  
7 T. Monaghan<sup>a</sup>

8  
9 **Affiliations:**

10 <sup>a</sup>Leibniz Institute of Freshwater Ecology and Inland Fisheries (IGB), Müggelseedamm 301/310,  
11 12587 Berlin, Germany

12 <sup>b</sup>Department of Biology-Chemistry-Pharmacy, Freie Universität Berlin, Takustraße 3, 14195  
13 Berlin, Germany

14 <sup>c</sup>Umwelt-Campus Birkenfeld, University of Applied Sciences Trier, Post Box 1380, 55761  
15 Birkenfeld, Germany

16 <sup>d</sup>Department of Aquatic Ecology, Universität Duisburg-Essen, D-45117 Essen, Germany

17 <sup>e</sup>German Centre for Integrative Biodiversity Research, Deutscher Platz 5e, 04103 Leipzig, Germany

18 <sup>f</sup>Trento University, Department of Civil, Environmental and Mechanical Engineering. Via Mesiano  
19 77, 38123 Trento, Italy

20 <sup>g</sup>Department of Science, University Roma Tre, viale Guglielmo Marconi 446, 00146 Rome, Italy

21  
22  
23 **Author for correspondence:**

24 Michael T. Monaghan

25 Leibniz-Institute of Freshwater Ecology and Inland Fisheries (IGB)

26 Müggelseedamm 301, 12587 Berlin, Germany

27 Email: [monaghan@igb-berlin.de](mailto:monaghan@igb-berlin.de)

28 Tel. +49 30 6418 1684

29 Fax. +49 30 6418 1682

30  
31  
32 **Keywords:**

33 Chironomidae, drought, haemoglobin, Hb, heat shock proteins, HSP70, oxygen, stress, temperature,  
34 warming

35

## 36 **Abstract**

37 The increasing impairment of lotic ecosystems has promoted a growing effort into assessing their  
38 ecological status by means of biological indicators. While community-based approaches have  
39 proven valuable to assess ecosystem integrity, they mostly reflect long-term changes and might not  
40 be suitable for tracking and monitoring short-term events. Responses to rapid changes in  
41 environmental conditions have been rarely studied under natural conditions. Biomarkers offer the  
42 benefit of integrating biological responses at different time scales. Here we used a field experiment  
43 to test how the synthesis of heat shock protein 70 (HSP70) and Haemoglobin (Hb) in laboratory-  
44 reared larvae of *Chironomus riparius* (Diptera, Chironomidae) were influenced by short-term  
45 changes to water temperature and oxygen concentration in a lowland stream. Our aim was to  
46 determine whether HSP70 mRNA expression and Hb content could be used as an *in situ* “early  
47 warning system” for freshwater habitats undergoing environmental change. HSP70 exhibited a clear  
48 response to changes in temperature measured over a one-day period, confirming its suitability as an  
49 indicator of environmental stress. Hb concentration was related to oxygen concentration, but not to  
50 temperature. Our findings support the hypothesis that depletion in oxygen induces Hb synthesis in  
51 *C. riparius* larvae. Because tolerance to low oxygen is not only related to total Hb, but also to a  
52 more efficient uptake (binding to Hb, e.g. Bohr effect) and release of oxygen to the cell (Root  
53 effect), we cannot discern from our data whether increased efficiency played a role. We suggest that  
54 *C. riparius* is a suitable model organism for monitoring sub-lethal stress in the field and that the  
55 approach could be applied to other species as more genomic data are available for non-model  
56 organisms.

57

## 58 **Introduction**

59

60 Streams and rivers are among the most threatened ecosystems, having been modified globally by  
61 catchment land-use changes, water abstraction, channelization, pollution and invasion of alien  
62 species (Vörösmarty et al., 2010; Dudgeon et al., 2006). Additionally, climate change is expected to  
63 alter hydrology and temperature regimes with severe effects on organisms and ecosystem functions  
64 (Ormerod and Durance 2012; Li et al., 2012; Floury et al., 2013). This increasing impairment of  
65 lotic ecosystems has promoted a growing effort into assessing their ecological status by means of  
66 biological indicators and sentinel species (Friberg, 2014). The classification of the ecological status  
67 of rivers is officially based on the assemblage structure of key taxonomic groups (e.g., Hering et al.,  
68 2003; Traversetti et al., 2015). While assemblage-based approaches have been proven valuable in  
69 the assessment of ecosystem integrity (Bae et al., 2014), they mostly reflect long-term changes,

70 associated with the local extirpation of sensitive taxa and overall changes in community  
71 composition. This approach may not be suitable for identifying and monitoring the effects of short-  
72 term events such as droughts and floods or other sub-lethal episodic events, whose frequency and  
73 magnitude is expected to increase in the near future (Ledger and Milner 2015). Biomarker assays  
74 (i.e. non-lethal responses of biological systems) are often used in eco-toxicological studies to assess  
75 the effects of pollutants, but their potential for tracking environmental change in the field has  
76 received little attention (Traversetti et al., 2017). Ideally, integrating indicators in a hierarchical  
77 fashion, from sub-organismal to organismal, population and community levels (Sures et al., 2015)  
78 should improve the assessment of ecosystem health over multiple spatio-temporal scales  
79 (Cajaraville et al., 2000; Lagadic et al., 2000; Colin et al., 2016).

80  
81 A promising approach is to use multiple indicators of stress in organisms (Frank et al., 2013).  
82 Multiple biomarkers may produce the benefit of integrating biological responses at different time  
83 scales and levels of organisation (Den Besten, 1998; Lagadic et al., 2000; Scalici et al., 2015). Two  
84 potential biomarkers for measuring sub-lethal effects in stream macroinvertebrates are heat shock  
85 proteins (HSP) and haemoglobin (Hb). HSP70 is a set of chaperon proteins involved in ensuring the  
86 correct folding and unfolding of proteins, and its expression is rapidly regulated by changes in  
87 physical (i.e. temperature) and chemical conditions (Lencioni et al., 2009; Lee et al., 2006), but it is  
88 not affected by handling stress (Sanders, 1993). The expression of HSP70 is therefore considered a  
89 short-term “early warning” indicator of environmental changes (Yoshimi et al., 2009; Folgar et al.,  
90 2015). For example, Lencioni et al (2013) observed an increase in HSP70 expression after 1h of  
91 heat stress at 26 °C in a cold-adapted non-biting midge (Diptera, Chironomidae) larvae.

92  
93 Chironomidae larvae can be abundant in degraded freshwater habitats, and are thus considered  
94 indicators of poor water quality and early colonizers after large-scale disturbances (Serra et al.  
95 2017). Resistance and resilience of chironomids is often attributed to the presence of hemoglobin  
96 (Hb), which allows them to tolerate low oxygen concentrations (Moller Pilot, 2009). In  
97 *Chironomus riparius*, Choi et al. (2001) observed a 151% increase in total Hb after 24 hours of  
98 hypoxia. Chironomidae larvae have been reported to secrete up to 16 different Hb types (Choi and  
99 Ha, 2009; Green et al., 1998). Such diversity of Hbs with specific binding properties allows for a  
100 fine-tuned loading and unloading of O<sub>2</sub> that regulates its delivery to specific tissues under variable  
101 environmental conditions (Choi and Ha, 2009; Ha and Choi, 2008; Weber and Vinogradov, 2001).

102

103 We used a field experiment to test how HSP70 expression and Hb production were influenced by  
104 short-term changes to temperature and oxygen concentration in a lowland stream. Laboratory-  
105 reared larvae of *Chironomus riparius* (Diptera, Chironomidae), a widespread species considered a  
106 model organism in aquatic toxicology (Lee et al., 2006; Lencioni et al., 2009; Morales et al., 2011;  
107 Marinkovic et al., 2011), were placed in a stream and sampled over a period of 1 to 8 days, while  
108 experiencing rapid variation in temperature and oxygen concentration.

109

## 110 **Methods**

111

112 The study was carried out in the lowland stream Groote Molenbeek in Limburg, Netherlands. In  
113 June 2010, two experimental reaches (upstream, downstream) were designated along the stream,  
114 each *ca.* 50 m in length and separated by *ca.* 200 m. In July 2010 the upstream and downstream  
115 reaches were separated by an artificial dam and a by-pass was constructed (Fig. 1a, b). The aim was  
116 to simulate summer drought conditions in the downstream reach, e.g., reduced water flow, reduced  
117 oxygen concentration, and increased water temperature. Experiments were performed in the  
118 upstream reach in June, prior to dam construction, and in both upstream and downstream reaches in  
119 August, after dam construction. No experiment was conducted in the downstream reach in June  
120 because abiotic conditions were nearly identical to those in the upstream reach. In August, heavy  
121 rainfall caused large and rapid variations in oxygen and water temperature in both reaches. While  
122 this event disrupted the desired effect of the experimental drought, it provided the opportunity to  
123 quantify short-term responses to sub-lethal environmental change in all reaches. Therefore, we did  
124 not compare control and experimental reaches, but rather we measured the physiological responses  
125 of *C. riparius* to the environmental changes experienced *in situ*. The following environmental  
126 variables were measured each day at 08:00 throughout the sampling periods in June and August:  
127 Temperature (°C), dissolved oxygen (mg O<sub>2</sub> l<sup>-1</sup>), conductivity (µS cm<sup>-1</sup>), and pH (measured with a  
128 Multi 340i/SET immersion probe WTW, Weilheim, Germany), water depth (m) and flow velocity  
129 (m sec<sup>-1</sup>) (measured using a 2030 flow-meter; General Oceanics, Miami, USA).

130

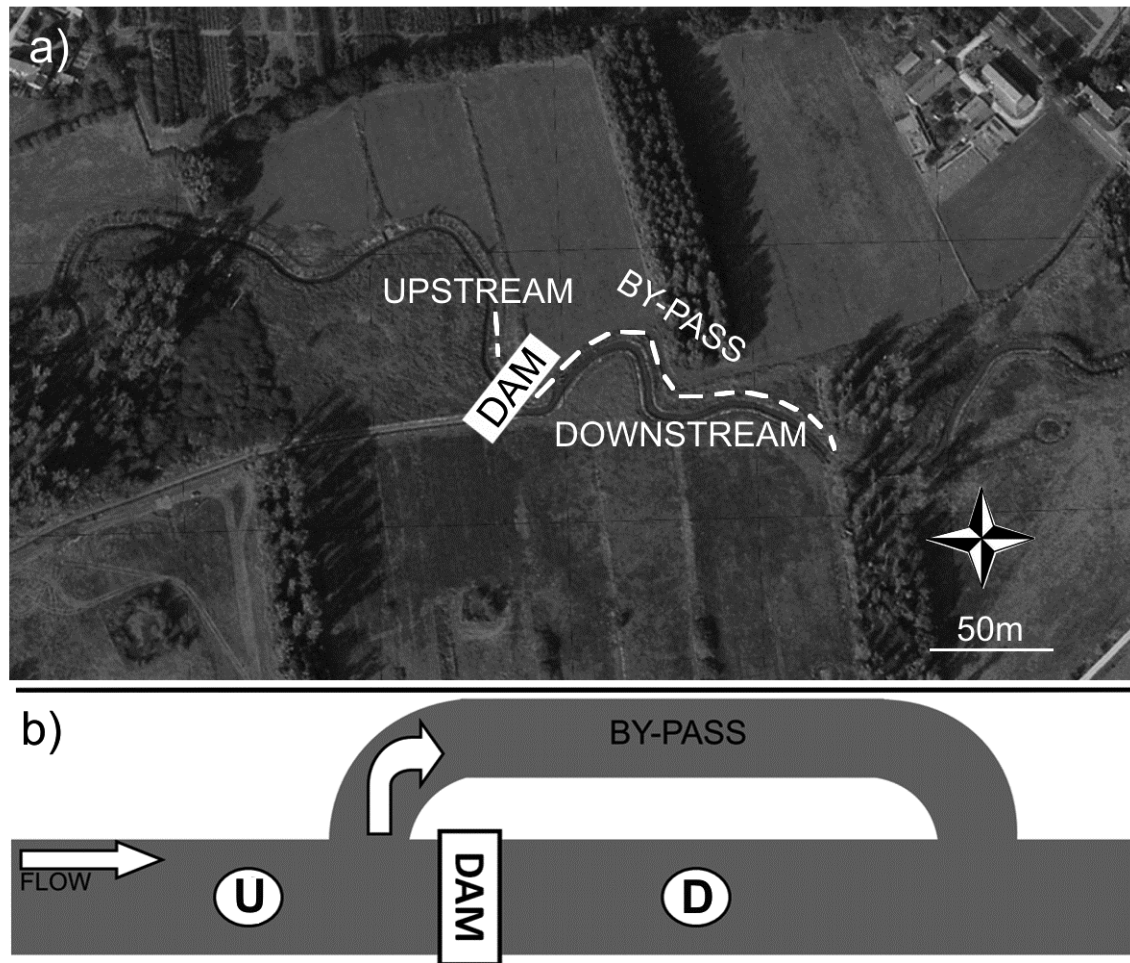

131

132 **Figure 1.** Study site. (a) overview of experimental reaches and dam position on the River Grote  
133 Molenbeek (51°23'30.79" N 6°2'31.89" E) (Sevenum, NL); (b) schematic view of dam, by-pass,  
134 upstream (U) and downstream (D) sites.

135

136

137 *Chironomus riparius* individuals were obtained from a permanent laboratory population at the  
138 Department of Aquatic Ecotoxicology in Frankfurt am Main, Germany. The single origin  
139 presumably minimized the genetic diversity among individuals (Nowak et al., 2012). Eggs were  
140 shipped to the IGB in Berlin, and after hatching, larvae were reared in aquaria for 4 months prior to  
141 the experiment according to the OECD (2004) guidelines. Laboratory aquaria were filled with fine  
142 quartz sand as substrate. Aquaria were constantly aerated and kept in a climate chamber in  
143 controlled conditions (20 °C, light:dark 16h:8h). Larvae were fed with commercial TetraMin® fish  
144 food (Tetrawerke, Melle, Germany). Mesh cages (16 x 12 x 12 cm; mesh: 0.2 mm; Fig. 2a) were  
145 designed ad-hoc from aquarium isolation chambers (Hagen Marina, Montreal, Canada) and used to  
146 transfer *C. riparius* larvae from the laboratory to the field and to introduce larvae into the



147 experimental reaches. This procedure enabled rapid sample collection, thus minimising handling  
148 stress.

149  
150 At the start of experiments, 25 mesh cages, with 100 larvae each (third and fourth instar), were  
151 placed on the stream bottom (Fig. 2b) in each reach (upstream in June, upstream and downstream in  
152 August). Fourth-instar larvae were used for HSP70 expression analysis (collected after 24, 96 and  
153 192 hours of exposure) and Hb analyses (24, 48, 96 and 192 hours of exposure; sample sizes in  
154 Appendix 1). Larvae were removed from cages with forceps, placed in cryo vials (Eppendorf),  
155 immediately placed in liquid nitrogen and stored at -80°C until analysis.

156

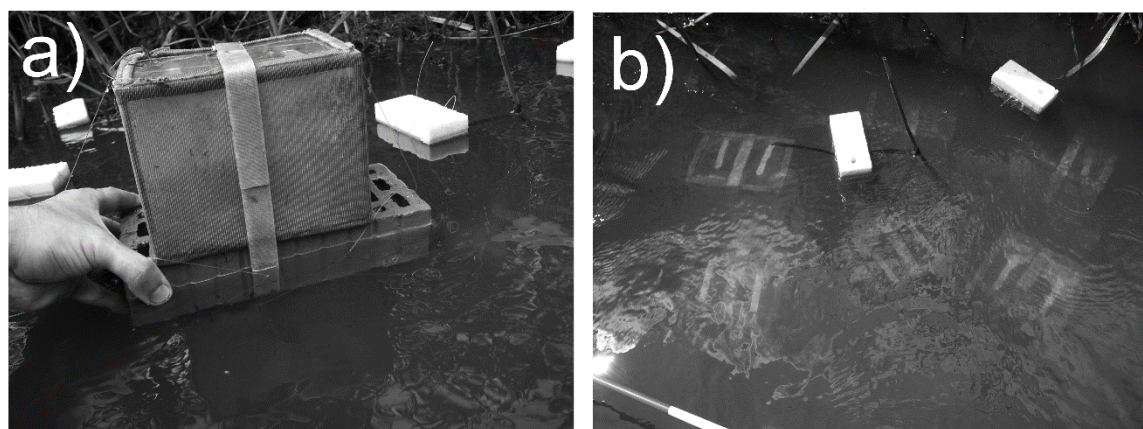

157

158

159 **Figure 2.** Experimental step in the stream: (a) *Chironomus riparius* experimental cages (16 x 12 x  
160 12 cm), and (b) their positioning on the river bed in a 100 x 250 cm area in upstream and  
161 downstream sites (see Fig. 1).

162

163 Total RNA was extracted from 7 individuals per time point and reach (n = 63; Appendix 1) using a  
164 Rneasy Mini kit (Qiagen, Hilden, Germany) with on-column DNase digestion (Trubiroha et al.  
165 2009). RNA concentration was measured using a Nanodrop ND-1000 (Thermo Fisher Scientific,  
166 Darmstadt, Germany). Reverse transcription was carried out with Affinity Script transcriptase  
167 (Agilent/Stratagene, Waldbronn, Germany). Primers for HSP70 and  $\beta$ -actin (Appendix 2) were  
168 designed using data from Park et al. (2010) and Morales et al. (2011) and specificity was confirmed  
169 by direct sequencing. Quantitative PCR was carried out with a Mx3005 (Agilent/Stratagene) using  
170 hot start polymerase (Phire Taq II, Life Technologies) and SYBR Green in a 20  $\mu$ L reaction volume  
171 (2  $\mu$ L diluted cDNA, 375 nM of each primer, 1x Taq buffer, 2 mM MgCl<sub>2</sub>, 0.5 mM each dNTP, 0.5  
172 fold diluted SYBR-Green I solution, 1 U polymerase) under the following conditions: 98°C initial

173 denaturation for 4 min, followed by 40 cycles of 98°C denaturation for 20 s, 62°C primer annealing  
174 for 15 s, and 72°C extension for 20 s. PCR efficiencies were determined in triplicate with a dilution  
175 series of pooled cDNA ( $\beta$  actin 99.6%; HSP70 98.4%). All samples were determined in duplicate.  
176 Expression was determined by the comparative  $\Delta\Delta C_T$  method (Pfaffl, 2001) with  $\beta$  actin used as a  
177 baseline (housekeeping) gene considering a calibrator sample (pooled cDNA) and correction for  
178 efficiency. Specificity of amplification was monitored by melting curve analysis.

179

180 Total Hb was measured in nine individuals per time point and reach (n=108; Appendix 1) using the  
181 cyanomethemoglobin method with a diagnostic haemoglobin reagent (DiaSys, International,  
182 Holzheim, Germany) as described by Wuertz et al. (2013). All samples were measured twice with  
183 an Infinite 200 microplate reader (Tecan, Mainz-Kastel, Germany) at 540 nm and concentration was  
184 calculated using a standard dilution series (120 mg/L haemoglobin standard, Diaglobal GmbH,  
185 Berlin, Germany). Total Hb was normalized to the total protein concentration determined by the  
186 Bradford (1976) method (RotiQuant Kit, Germany) as  $\mu\text{g Hb}/\mu\text{g total proteins}$ .

187

188 Linear mixed-effect (LME) models were used to analyse variation in HSP70 expression and Hb  
189 concentration in relation to variation in environmental conditions.

190 After testing for collinearity using a Spearman test (also from among all the measured  
191 environmental variables, see Appendix 3) the model for both HSP70 and Hb initially incorporated  
192 T, O<sub>2</sub> and changes in temperature ( $\Delta T$ ) and oxygen ( $\Delta O_2$ ) as fixed factors. The latter two variables  
193 were calculated as the absolute change (i.e., increase or decrease) in T (°C) or O<sub>2</sub> (mg O<sub>2</sub> L<sup>-1</sup>) from  
194 the previous sampling time (every 24h). Model factors were then backward-selected using  
195 likelihood ratio tests against reduced models (without the fixed factor) (Zuur et al. 2009). Final  
196 models included fixed factors  $\Delta T$ ,  $\Delta O_2$  and T for HSP70 model and O<sub>2</sub> for Hb model. Collection  
197 time nested in the reach-season (upstream-June; upstream-August; downstream-August) was  
198 considered as a random factor to account for repeated sampling. The variance explained by each  
199 model was calculated as marginal ( $R^2_m$ ) (Nakagawa and Schielzeth, 2013) using the MuMIn  
200 package (Barton 2016) for R v3.3.1 (R Core Team, 2015). Residuals were tested for normality  
201 with a Wilk-Shapiro test and qq-plots, and scores were log-transformed to remove  
202 heteroscedasticity if necessary.

203

204

205 **Results**

206

207 Initial environmental conditions in June (Fig. 3) were assumed to be identical between the upstream  
 208 and downstream sites in August due to their close proximity and the lack of a dam. In August, mean  
 209 water flow, channel depth, dissolved oxygen, and conductivity varied after placement of the dam  
 210 and after heavy rain events (Appendix 4b, c, e, f). Flow, depth, and conductivity all decreased in  
 211 August and varied between reaches (Appendix 4c, f), whereas oxygen increased substantially in the  
 212 upstream reach and less in the downstream reach, compared to June (Fig. 3a, Appendix 4b). HSP70  
 213 expression in the upstream reach in June was stable after 24 and 96 hours but increased at 192 hours  
 214 in June. Expression peaked at 96 hours in both reaches in August, following a rapid change in T  
 215 (Fig. 3b). The mixed effect model combining all data from June and August indicated significant  
 216 positive relationships between HSP70 expression and change in temperature ( $\Delta T$ ) and oxygen  
 217 ( $\Delta O_2$ ) over the previous 24 hr (Table 1).

218

219 **Table 1.** Results of linear mixed effect (LME) models for the relative heat shock protein 70  
 220 (HSP70) expression (standardized to the calibrator) and hemoglobin (Hb) response to  
 221 environmental changes, including marginal variance ( $R^2_m$ ), estimate of the fixed effects (Estim),  
 222 standard error (SE), degrees of freedom (dF) and t-statistic (t-value and factor significance). Fixed  
 223 factors: change in Oxygen ( $\Delta O_2$ , mg  $O_2$   $l^{-1}$ ); absolute change in T ( $\Delta T$ ,  $^{\circ}C$ ); Temperature (T,  $^{\circ}C$ );  
 224 oxygen ( $O_2$ , mg  $O_2$   $l^{-1}$ ). \* =  $p < 0.05$ , \*\* =  $p < 0.01$ , \*\*\* =  $p < 0.001$ .

|                                                            | Factors      | Estim  | SE    | dF | t-value | p         |
|------------------------------------------------------------|--------------|--------|-------|----|---------|-----------|
| HSP70 (fold-increase)<br>( $R^2_m = 0.43$ )                | Intercept    | -1.127 | 0.844 | 5  | -1.33   | 0.239     |
|                                                            | $\Delta O_2$ | 0.139  | 0.052 | 5  | 2.65    | 0.045*    |
|                                                            | $\Delta T$   | 0.227  | 0.071 | 5  | 3.17    | 0.025*    |
|                                                            | T            | 0.111  | 0.046 | 5  | 2.42    | 0.066*    |
| Hb ( $\mu g$ Hb/ $\mu g$ total prot)<br>( $R^2_m = 0.34$ ) | Intercept    | 0.716  | 0.089 | 18 | 8.01    | <0.001*** |
|                                                            | $O_2$        | -0.044 | 0.012 | 20 | -3.73   | 0.001***  |

239



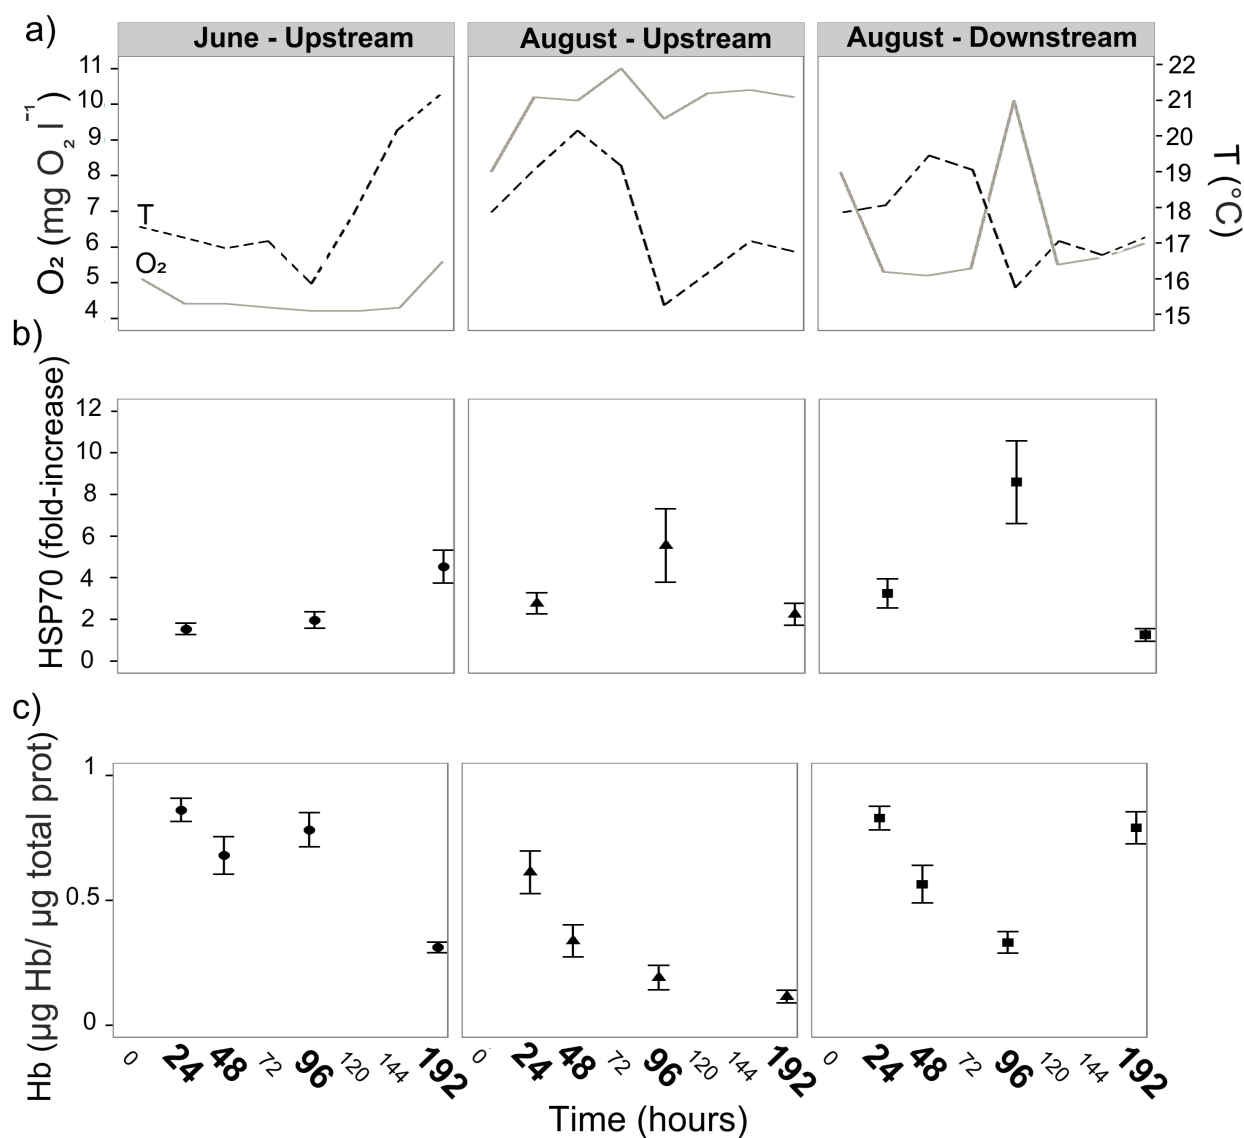

240

241

242

243

244

245

246

247

248

**Figure 3.** Environmental variables and physiological responses of *Chironomus riparius* larvae: (a) changes in oxygen concentration (solid line) and temperature (broken line) as measured at 08:00 each day during the experiments in June and August and at 1 hour before sample collection (hours indicated in bold on the y-axis); (b) mean ( $\pm$  SE) relative heat shock protein 70 (HSP70) expression standardized to the calibrator at 24, 96, and 192 hours; (c) mean ( $\pm$  SE) haemoglobin (Hb) concentration at 24, 48, 96 and 192 hours.

249 Hb concentrations in the upstream reach remained similar after 24, 48, and 96 hours and were  
250 lowest after 192 hours in June, after a mild increase in dissolved O<sub>2</sub>. (Fig. 3c). In August, Hb  
251 declined steadily over 24, 28, and 96 hours in both reaches. In the upstream reach, Hb continued to  
252 decline after 192 hours during relatively stable O<sub>2</sub> levels, but increased markedly in the  
253 downstream reach following a peak and subsequent rapid decline in O<sub>2</sub> after in 192 hours (Fig. 3c).  
254 The mixed effect model indicated that Hb content increased with decreasing oxygen concentration  
255 (O<sub>2</sub>) (Table 1).

256

## 257 **Discussion**

258 We applied an eco-toxicological stress-response approach to a field experiment in order to examine  
259 how changes in water temperature and dissolved oxygen concentration influenced two  
260 physiological biomarkers in a model organism. Our markers were chosen to reflect short-term  
261 (HSP70 mRNA expression) and medium-term (blood Hb content) responses to environmental  
262 changes. Contrary to conventional bio-assessment programmes, where the presence or abundance of  
263 different aquatic organisms are used as indicator of environmental change or degradation, our aim  
264 was to determine whether physiological biomarkers in a model organism could be used *in situ* as an  
265 “early warning system” for freshwater habitats undergoing environmental change. Assemblage-  
266 level responses may manifest only at a later stage of environmental degradation, thus hindering  
267 prompt mitigation actions. Many studies of stress response are conducted in the laboratory and  
268 often under conditions unlikely to represent those of natural habitats (see Sures et al. 2015). Our  
269 intent was to extend this approach to realistic field conditions. In addition, we used a model  
270 organism group (Chironomidae) that is almost ubiquitous in aquatic habitats and is among the first  
271 colonizers after disturbance events such as droughts or floods (Calle-Martinez and Casas, 2006;  
272 Langton and Casas, 1998; Marziali et al., 2010; Puntì et al., 2007). HSP70 exhibited a clear  
273 response to changes in temperature (and partially in oxygen) measured over a one-day period prior  
274 to sampling. The expression of HSP70 is known to be related to acute cellular stresses (Morimoto  
275 and Santoro 1998), and Feder and Hofmann (1999) observed the presence of HSP-inducing  
276 microhabitats (e.g. shallow or stagnant water systems) where mild environmental variations (e.g.  
277 temperature) induced variations in HSP expression. HSP70s have also been reported reliable means  
278 of detecting such stress (Lencioni et al., 2009, Foster et al., 2015). This may be due to the fact that  
279 in dynamic systems such as small waterbodies, environmental parameters like temperature and  
280 oxygen vary slightly but continuously, causing an increase of the long-term memory formation as  
281 an adaptive response of the organisms (Foster et al., 2015). Memory formation increases synaptic  
282 efficacy and improves the adaptive responses to stress conditions including the basal mRNA

283 transcriptional system (Stork and Welzl, 1999, Monari et al., 2011) in which HSP70 are also  
284 included. This further supports the suitability of the HSP70 as multi-stressors indicator.

285

286 In this study, haemoglobin concentration was related to oxygen concentration, but not to water  
287 temperature. Results from other studies indicate that the tolerance of *C. riparius* larvae to low levels  
288 of dissolved oxygen is associated with increased haemoglobin in their hemolymph (Weber, 1980;  
289 Choi et al., 2000), which allows sustaining aerobic and anaerobic metabolism (alcoholic  
290 fermentation) at the same time for short periods (Frank, 1983). Under hypoxic conditions, Hb  
291 synthesis is stimulated and used for aerobic metabolism (Choi et al., 2000; Lee et al., 2006; Rossaro  
292 et al., 2007). This process likely occurred in our experiment where the observed depletion in  
293 oxygen concentration induced synthesis of Hb in *C. riparius* larvae. Nonetheless, tolerance to low  
294 oxygen is not only related to total Hb, but also to a more efficient uptake (binding to Hb; Bohr  
295 effect) and release of oxygen to the cell (Root effect). However, we cannot discern from our data  
296 whether increased efficiency played a role. The synthesis of HSP70 and Hb are likely linked,  
297 because temperature and oxygen concentration are closely interconnected. Our results suggest that  
298 the responses of HSP70 and Hb to environmental change represent an integrated process in which  
299 HSP70 increased as a direct consequence of increased temperature. Subsequently, increased  
300 temperatures likely led to a decline in Oxygen concentration that promoted additional synthesis of  
301 Hb.

302

303 In conclusion, we suggest that the sub-lethal stress response at multiple markers make *C. riparius* a  
304 suitable biological tool for the assessment of short-term, sub-lethal effects of environmental change  
305 in the field. The different temporal scales involved in the response of the two markers indicate that  
306 a variety of impacts could be assessed prior to local extinction. Because the frequency of extreme  
307 hydrological events is likely to increase in the future owing to global climate change, 'early-  
308 warning' indicators could allow the rapid assessment of environmental degradation. As more  
309 genomic data are made available, our approach could be extended to other taxonomic groups with  
310 different environmental requirements and additional genetic markers.

311

### 312 **Acknowledgements**

313 We thank Annemarie Garssen (University of Utrecht) for help in the field, Marino Marinkovic  
314 (University of Amsterdam) and Karsten Nowak (Senckenberg Research Institute) for help with  
315 *Chironomus* larvae, and Wibke Kleiner, Katrin Preuss, and Ann-Christin Honnen (IGB) for help in  
316 the laboratory. Furthermore, we thank Bernd Sures (University of Duisburg-Essen) for valuable

317 comments on a previous version of the manuscript. AM was partially funded by the Education,  
318 Audiovisual and Culture Executive Agency of the European Commission within the Erasmus  
319 Mundus Joint Doctorate Program SMART.

320

## 321 **References**

322

323 Adams, S. M., Greeley, M. S. 2000. Ecotoxicological indicators of water quality: using multi-  
324 response indicators to assess the health of aquatic ecosystems. *Water, Air, & Soil Pollution*  
325 123:103-115.

326 Bae M. J., Li F., Kwon Y. S., Chung N., Choi H., Hwang S. J., Park Y.S. 2014. Concordance of  
327 diatom, macroinvertebrate and fish assemblages in streams at nested spatial scales: Implications  
328 for ecological integrity. *Ecological Indicators* 47:89-101.

329 Barton, K. 2016. MuMIn: Multi-model inference. R package version 1.15.6. [https://CRAN.R-](https://CRAN.R-project.org/package=MuMIn)  
330 [project.org/package=MuMIn](https://CRAN.R-project.org/package=MuMIn).

331 Bradford, M. M. 1976. A rapid and sensitive method for the quantitation of microgram quantities of  
332 protein utilizing the principle of protein-dye binding. *Analytical biochemistry* 72:248-254.

333 Cajaraville, M. P., Bebianno, M. J., Blasco, J., Porte, C., Sarasquete, C., Viarengo, A. 2000. The  
334 use of biomarkers to assess the impact of pollution in coastal environments of the Iberian  
335 Peninsula: a practical approach. *Science of the Total Environment* 247:201-212.

336 Calle-Martinez, D., Casas, J. J. 2006. Chironomid species, stream classification, and water-quality  
337 assessment: the case of 2 Iberian Mediterranean mountain regions. *Journal of the North*  
338 *American Benthological Society* 25:465-476.

339 Choi, J., Roche H., Caquet T. 2000. Effects of physical (hypoxia, hyperoxia) and chemical  
340 (potassium dichromate, fenitrothion) stress on antioxidant enzyme activities in *Chironomus*  
341 *riparius* mg. (Diptera, Chironomidae) larvae: potential biomarkers. *Environmental Toxicology*  
342 *and Chemistry* 19:495-500.

343 Choi, J., Roche, H., Caquet, T. 2001. Hypoxia, hyperoxia and exposure to potassium dichromate or  
344 fenitrothion alter the energy metabolism in *Chironomus riparius* mg. (Diptera: Chironomidae)  
345 larvae. *Comparative Biochemistry and Physiology Part C: Toxicology and Pharmacology*  
346 130:11-17.

347 Choi, J., Ha, M. H. 2009. Effect of cadmium exposure on the globin protein expression in 4th instar  
348 larvae of *Chironomus riparius* mg. (Diptera: Chironomidae): An ecotoxicoproteomics approach.  
349 *Proteomics* 9:31-39.

- 350 Colin N, Porte, C., Fernandes, D., Barata, C., Padrós, F., Carrassón, M., Monroy, M., Cano-  
351 Rocabayera, O., de Sostoa, A., Piña, B., Maceda-Veiga, A. 2016. Ecological relevance of  
352 biomarkers in monitoring studies of macro-invertebrates and fish in Mediterranean rivers.  
353 *Science of the Total Environment* 540:307-323.
- 354 Den Besten, P. J., 1998. Concepts for the implementation of biomarkers in environmental  
355 monitoring. *Marine Environmental Research* 46:253-256.
- 356 Dudgeon, D., Arthington, A. H., Gessner, M. O., Kawabata, Z., Knowler, D., Leveque, C., Naiman,  
357 R. J., Prieur-Richard, A. H., Soto, D., Stiassny, M. L. J., 2006. Freshwater biodiversity:  
358 importance, threats, status, and conservation challenges. *Biological Reviews* 81:163-182.
- 359 Feder, M. E., Hofmann, G. E. 1999. Heat-shock proteins, molecular chaperones, and the stress  
360 response: evolutionary and ecological physiology. *Annual Review of Physiology* 61:243-282.
- 361 Floury, M., Usseglio-Polatera, P., Ferreol, M., Delattre, C., Souchon, Y. 2013. Global climate  
362 change in large European rivers: long-term effects on macroinvertebrate communities and  
363 potential local confounding factors. *Global Change Biology* 19:1085–1099.
- 364 Folgar, R.M., de la Fuente, M., Morcillo, G., Martínez-Guitarte, J. L. 2015. Characterization of six  
365 small HSP genes from *Chironomus riparius* (Diptera, Chironomidae): Differential expression  
366 under conditions of normal growth and heat-induced stress. *Comparative Biochemistry and*  
367 *Physiology, Part A* 188 :76–86.
- 368 Foster, N. L., Lukowiak, K., Henry, T. B. 2015. Time-related expression profiles for heat shock  
369 protein gene transcripts (HSP40, HSP70) in the central nervous system of *Lymnaea stagnalis*  
370 exposed to thermal stress. *Communicative and Integrative Biology* 8:e1040954.
- 371 Frank, C., 1983. Ecology, production and anaerobic metabolism of *Chironomus plumosus* L. larvae  
372 in a shallow lake. *Archiv für Hydrobiologie* 96:354-362.
- 373 Friberg, N., 2014. Impacts and indicators of change in lotic ecosystems. *Wiley Interdisciplinary*  
374 *Reviews: Water* 1:513-531.
- 375 Frank, S. N., Godehardt, S., Nachev, M., Trubiroha, A., Kloas, W., Sures, B. 2013. Influence of the  
376 cestode *Ligula intestinalis* and the acanthocephalan *Polymorphus minutus* on levels of heat  
377 shock protein 70 (HSP70) and metallothionein in their fish and crustacean intermediate hosts.  
378 *Environmental Pollution* 180:173-179.
- 379 Green, B. N., Kuchumov, A. R., Hankeln, T., Schmidt, E. R., Bergtrom, G., Vinogradov, S. N.  
380 1998. An electrospray ionization mass spectrometric study of the extracellular hemoglobins from  
381 *Chironomus thummi thummi*. *Biochimica et Biophysica Acta* 1383:143-150.



- 382 Ha, M. H., Choi, J. 2008. Effects of environmental contaminants on hemoglobin of larvae of  
383 aquatic midge, *Chironomus riparius* (Diptera : Chironomidae): A potential biomarker for  
384 ecotoxicity monitoring. *Chemosphere* 71:1928-1936.
- 385 Hering, D., Buffagni, A., Moog, O., Sandin, L., Sommerhäuser, M., Stubauer, I., Zahrádková, S.  
386 2003. The development of a system to assess the ecological quality of streams based on  
387 macroinvertebrates—design of the sampling programme within the AQEM project. *International*  
388 *Review of Hydrobiology* 88:345-361.
- 389 Lagadic, L., Caquet, T., Amiard, J. C., Ramade, F. 2000. Use of Biomarkers in Monitoring  
390 Environmental Health. Balkema, Rotterdam, The Netherlands and Science Publishers, Inc.,  
391 Enfield.
- 392 Langton, P. H., Casas, J. 1998. Changes in chironomid assemblage composition in two  
393 Mediterranean mountain streams over a period of extreme hydrological conditions.  
394 *Hydrobiologia* 390:37-49.
- 395 Ledger, M. E., Milner, A. M. 2015. Extreme events in running waters. *Freshwater Biology* 60:  
396 2455–2460.
- 397 Lee, S. M., Lee, S. B., Park, C. H., Choi, J. 2006. Expression of heat shock protein and hemoglobin  
398 genes in *Chironomus tentans* (Diptera, chironomidae) larvae exposed to various environmental  
399 pollutants: a potential biomarker of freshwater monitoring. *Chemosphere* 65:1074-1081.
- 400 Lencioni, V., Boschini, D., Rebecchi, L. 2009. Expression of the 70 kDa Heat shock protein family  
401 in Alpine freshwater chironomids (Diptera, Chironomidae) under natural conditions. *Journal of*  
402 *Limnology* 68:251-256.
- 403 Lencioni, V., Bernabo, P., Cesari, M., Rebecchi, L. 2013. Thermal stress induces HSP70 proteins  
404 synthesis in larvae of the cold stream non – biting midge *Diamesa cinerella* Meigen. *Archives of*  
405 *Insect Biochemistry and Physiology* 83:1-14.
- 406 Li, F., Cai, Q., Jiang, W., Qu, X. 2012. The response of benthic macroinvertebrate communities to  
407 climate change: evidence from subtropical mountain streams in Central China. *International*  
408 *Review of Hydrobiology* 97:200–214.
- 409 Marinkovic, M., Verweij, R. A., Nummerdor, G. A., Jonker, M. J., Kraak, M. H., Admiraal, W.  
410 2011. Life cycle responses of the midge *Chironomus riparius* to compounds with different modes  
411 of action. *Environmental Science and Technology* 45:1645-1651.
- 412 Marziali, L., Armanini, D. G., Cazzola, M., Erba, S., Toppi, E., Buffagni, A., Rossaro, B. 2010.  
413 Responses of chironomid larvae (Insecta, Diptera) to ecological quality in Mediterranean river  
414 mesohabitats (South Italy). *River Research and Applications* 26:1036-1051.

- 415 Moller Pillot, H. K. M. 2009. Chironomidae larvae — biology and ecology of the Chironomini -  
416 volume II. . Zeist: KNNV Publishing.
- 417 Monari, M., Foschi, J., Rosmini, R., Marin, M. G., Serrazanetti, G. P. 2011. Heat shock protein 70  
418 response to physical and chemical stress in *Chamelea gallina*. *Journal of experimental marine*  
419 *biology and ecology* 397:71-78.
- 420 Morales, M., Planelló, R., Martínez-Paz, P., Herrero, O., Cortés, E., Martínez-Guitarte, J. L.,  
421 Morcillo, G. 2011. Characterization of Hsp70 gene in *Chironomus riparius*: expression in  
422 response to endocrine disrupting pollutants as a marker of ecotoxicological stress. *Comparative*  
423 *Biochemistry and Physiology Part C: Toxicology & Pharmacology* 153:150-158.
- 424 Morimoto, R. I., Santoro, M. G. 1998. Stress-inducible responses and heat shock proteins: new  
425 pharmacologic targets for cytoprotection. *Nature Biotechnology* 16:833-838.
- 426 Nakagawa, S., Schielzeth, H. 2013. A general and simple method for obtaining R2 from generalized  
427 linear mixed-effects models. *Methods in Ecology and Evolution* 4:133-142.
- 428 Nowak, C., Vogt, C., Oehlmann, J., Pfenninger, M., Schwenk, K., Streit, B., and Oetken, M. 2012.  
429 Impact of genetic diversity and inbreeding on the life-history of *Chironomus* midges over  
430 consecutive generations. *Chemosphere* 88:988-993.
- 431 OECD, 2004. Test No. 219: Sediment-water chironomid toxicity using spiked water. OECD  
432 Publishing. <http://dx.doi.org/10.1787/9789264070288-en>
- 433 Ormerod, S. J., Durance, I. 2012. Understanding and managing climate change effects on river  
434 ecosystems. In *River Conservation and Management* (eds P. J. Boon and P. J. Raven), John  
435 Wiley & Sons, Ltd, Chichester, UK.
- 436 Park, K., Park, J., Kim, J., Kwak, I. S. 2010. Biological and molecular responses of *Chironomus*  
437 *riparius* (Diptera, Chironomidae) to herbicide 2, 4-D (2, 4-dichlorophenoxyacetic acid).  
438 *Comparative Biochemistry and Physiology Part C: Toxicology & Pharmacology* 151:439-446.
- 439 Pfaffl, M. W. 2001. A new mathematical model for relative quantification in real-time RT-PCR.  
440 *Nucleic acids Research* 29:e45.
- 441 Puntì, T., Rieradevall, M., Prat, N. 2007. Chironomidae assemblages in reference condition  
442 Mediterranean streams: environmental factors, seasonal variability and ecotypes. *Fundamental*  
443 *and Applied Ecology* 170:149-165.
- 444 R Core Team (2015). R: A Language and Environment for Statistical Computing. Vienna: R  
445 Foundation for Statistical Computing; 2013. Available online at: <http://www.r-project.org>.
- 446 Rossaro, B., Cardoso, A. C., Solimini, A., Free, G., Marziali, L., Giacchini, R. 2007: A biotic index  
447 using benthic macroinvertebrates for Italian lakes. *Ecological Indicators* 7:412-429.

- 448 Sanders, B. 1993. Stress proteins in aquatic organisms: an environmental perspective. *Critical*  
449 *Reviews in Toxicology* 23:49e75.
- 450 Scalici, M., Traversetti, L., Spani, F., Malafoglia, V., Colamartino, M., Persichini, T., Cappello, S.,  
451 Mancini, G., Guerriero, G., Colasanti, M. 2017. Shell fluctuating asymmetry in sea-dwelling  
452 benthic bivalves as morphological markers to detect environmental chemical contamination.  
453 *Ecotoxicology* 26:396–404.
- 454 Scalici, M., Traversetti, L., Malafoglia, V., Colamartino, M., Persichini, T., Colasanti, M. 2015.  
455 Concepts and tools for exploiting sessile bio-filters as early warning elements: introductory  
456 applications for marine ecosystem preservation. *Invertebrate Survival Journal* 12:278-286.
- 457 Serra, S. R. Q., Graca, M. A. S., Doledec, S., Feio, M. J. 2017. Chironomidae traits and life history  
458 strategies as indicators of anthropogenic disturbance. *Environmental Monitoring and Assessment*  
459 189:326.
- 460 Stork, O., Welzl, H. 1999. Memory formation and the regulation of gene expression. *Cellular and*  
461 *Molecular Life Sciences* 55:575-592.
- 462 Sures, B., Ruchter, N., Zimmermann, S. 2015. Biological effects of PGE on aquatic organisms. In  
463 Zereini, F. Wiseman, C.L.S. (Eds.): *Platinum Metals in the Environment*. 383-399, Springer-  
464 Verlag Berlin.
- 465 Thompson, M. S. A., Bankier, C., Bell, T., Dumbrell, A. J., Gray, C., Ledger, M. E., Lehmann, K.,  
466 McKew, B. A., Sayer, C. D., Shelley, F., Trimmer, M., Warren, S. L., Woodward, G. 2016.  
467 Gene-to-ecosystem impacts of a catastrophic pesticide spill: testing a multilevel bioassessment  
468 approach in a river ecosystem. *Freshwater Biology* 61:2037–2050.
- 469 Traversetti, L., Ceschin, S., Manfrin, A., Scalici, M. 2015. Co-occurrence between macrophytes and  
470 macroinvertebrates: towards a new approach for the running waters quality evaluation? *Journal*  
471 *of Limnology* 74:133–142.
- 472 Traversetti, L., Del Grosso, F., Malafoglia, V., Colasanti, M., Ceschin, S., Larsen, S., Scalici, M.  
473 2017. The Hydra regeneration assay reveals ecological risks in running waters: a new proposal to  
474 detect environmental teratogenic threats. *Ecotoxicology* 26:184–195.
- 475 Vörösmarty, C. J., Green, P., Salisbury, J., Lammers, R. B. 2010. Global water resources:  
476 vulnerability from climate change and population growth. *Science* 289:284-288.
- 477 Weber, R. E. 1980. Functions of invertebrate hemoglobins with special reference to adaptations to  
478 environmental hypoxia. *American Zoologist* 20:79-101.
- 479 Weber, R. E., Vinogradov, S. N. 2001. Nonvertebrate hemoglobins: Functions and molecular  
480 adaptations. *Physiological Review* 81:569-628.

- 481 Wuertz, S., Schulze, S. G. E., Eberhardt, U., Schulz, C., Schroeder, J. P. 2013. Acute and chronic  
482 nitrite toxicity in juvenile pike-perch (*Sander lucioperca*) and its compensation by chloride.  
483 *Comparative Biochemistry and Physiology Part C: Toxicology & Pharmacology* 157:352-360.
- 484 Yoshimi, T., Odagiri, K., Hiroshige, Y., Yokobori, S. I., Takahashi, Y., Sugaya, Y., Miura, T. 2009.  
485 Induction profile of HSP70-cognate genes by environmental pollutants in Chironomidae.  
486 *Environmental Toxicology and Pharmacology* 28: 294-301.
- 487 Zuur, A. F., Ieno, E. N., Walker, N. J., Savaliev, A. A., Smith, G. M. 2009. Mixed effect modelling  
488 for nested data. In *mixed effects models and extensions in R* (pp. 101-142). Springer, New York,  
489 NY.
- 490
- 491

492 **Supplementary material**

493

494 **Appendix 1.** Sample sizes (number of individual *C. riparius*) for each analysis in the study given  
495 for each time point of collection in hours (h), with HSP70 = heat shock protein 70 mRNA  
496 expression; Hb = haemoglobin concentration.

497

| Reach               | Marker | Number of samples ( <i>n</i> ) |     |     |      |       |
|---------------------|--------|--------------------------------|-----|-----|------|-------|
|                     |        | 24h                            | 48h | 96h | 192h | total |
| June – upstream     | HSP70  | 7                              |     | 7   | 7    | 21    |
|                     | Hb     | 9                              | 9   | 9   | 9    | 36    |
| August – upstream   | HSP70  | 7                              |     | 7   | 7    | 21    |
|                     | Hb     | 9                              | 9   | 9   | 9    | 36    |
| August – downstream | HSP70  | 7                              |     | 7   | 7    | 21    |
|                     | Hb     | 9                              | 9   | 9   | 9    | 36    |

498

499

500

501

502

503



504 **Appendix 2.** Newly designed forward (F) and reverse (R) primer sequences used for the RT- PCR  
505 for heat shock protein 70 (HSP70) and  $\beta$  actin gene expression in *C. riparius*.  
506

| Primer          | Sequence                   |
|-----------------|----------------------------|
| HSP70 F         | 5'-CATGTGAACGAGCCAAGAGA-3' |
| HSP70 R         | 5'-TCGAGTTGATCCACCAACAA-3' |
| $\beta$ actin F | 5'-GATGAAGATCCTCACCGAAC-3' |
| $\beta$ actin R | 5'-CCTTACGGATATCAACGTCG-3' |

507  
508

509 **Appendix 3.** Statistics from Spearman correlation test (scores under diagonal) and p-values (over  
510 diagonal) for correlated environmental variables: oxygen ( $O_2$ ,  $\text{mg O}_2 \text{ l}^{-1}$ ); temperature (T,  $^\circ\text{C}$ );  
511 conductivity (Cond,  $\mu\text{S cm}^{-1}$ ); pH; water flow (Flow,  $\text{m s}^{-1}$ ); change in Oxygen ( $\Delta O_2$ ,  $\text{mg O}_2 \text{ l}^{-1}$ );  
512 changes in T ( $\Delta T$ ,  $^\circ\text{C}$ ).

513  
514

|            | $O_2$  | T     | Cond   | pH     | Flow | $\Delta O$ | $\Delta T$ |
|------------|--------|-------|--------|--------|------|------------|------------|
| $O_2$      |        |       | *      | ***    | *    |            |            |
| T          |        |       |        |        |      |            | **         |
| Cond       | -0.489 |       |        | **     | ***  |            |            |
| pH         | 0.664  |       | -0.597 |        | **   |            |            |
| Flow       | -0.447 |       | 0.750  | -0.530 |      |            |            |
| $\Delta O$ |        |       |        |        |      |            |            |
| $\Delta T$ |        | 0.565 |        |        |      |            |            |

515  
516  
517  
518

519 **Appendix 4.** Environmental variables (panels a to f) (median, first and third quartile, minimum and  
520 maximum) from data collected every 24 hours at 08:00 from 24h to 192 h of the experiments) in the  
521 two reaches in June and August.  
522

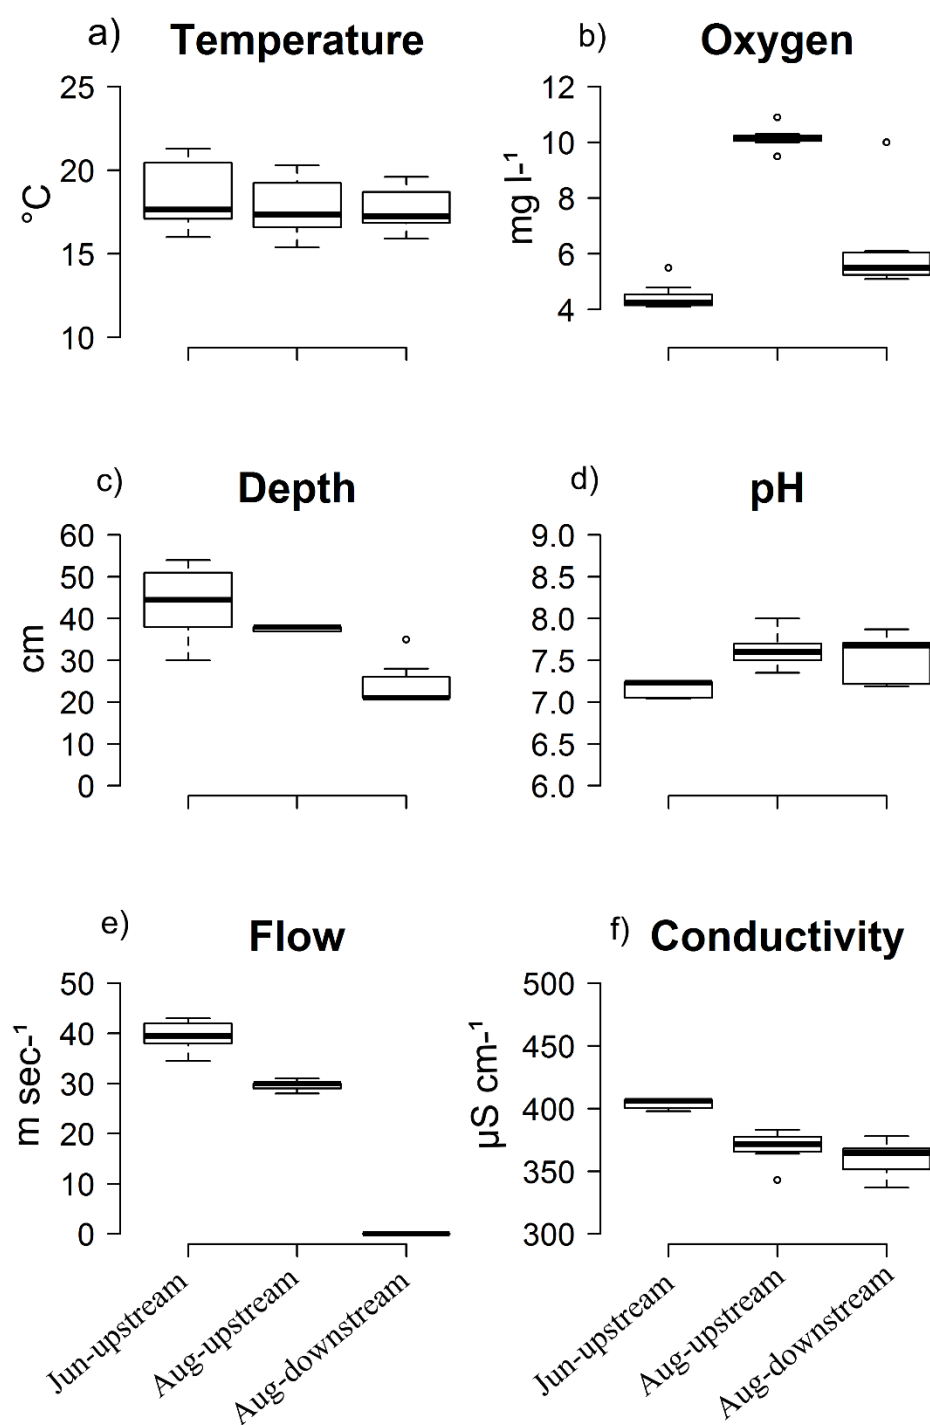

523  
524  
525  
526
